# Supplementary material for: Genomic Characterization and Initial Insight into Mastitis-Associated SNP Profiles of Local Latvian Bos taurus Breeds
Source: MDPI journal article supplement (doi:10.3390/ani13172776), 2023-08-31
Supplement: s1 [file s1]

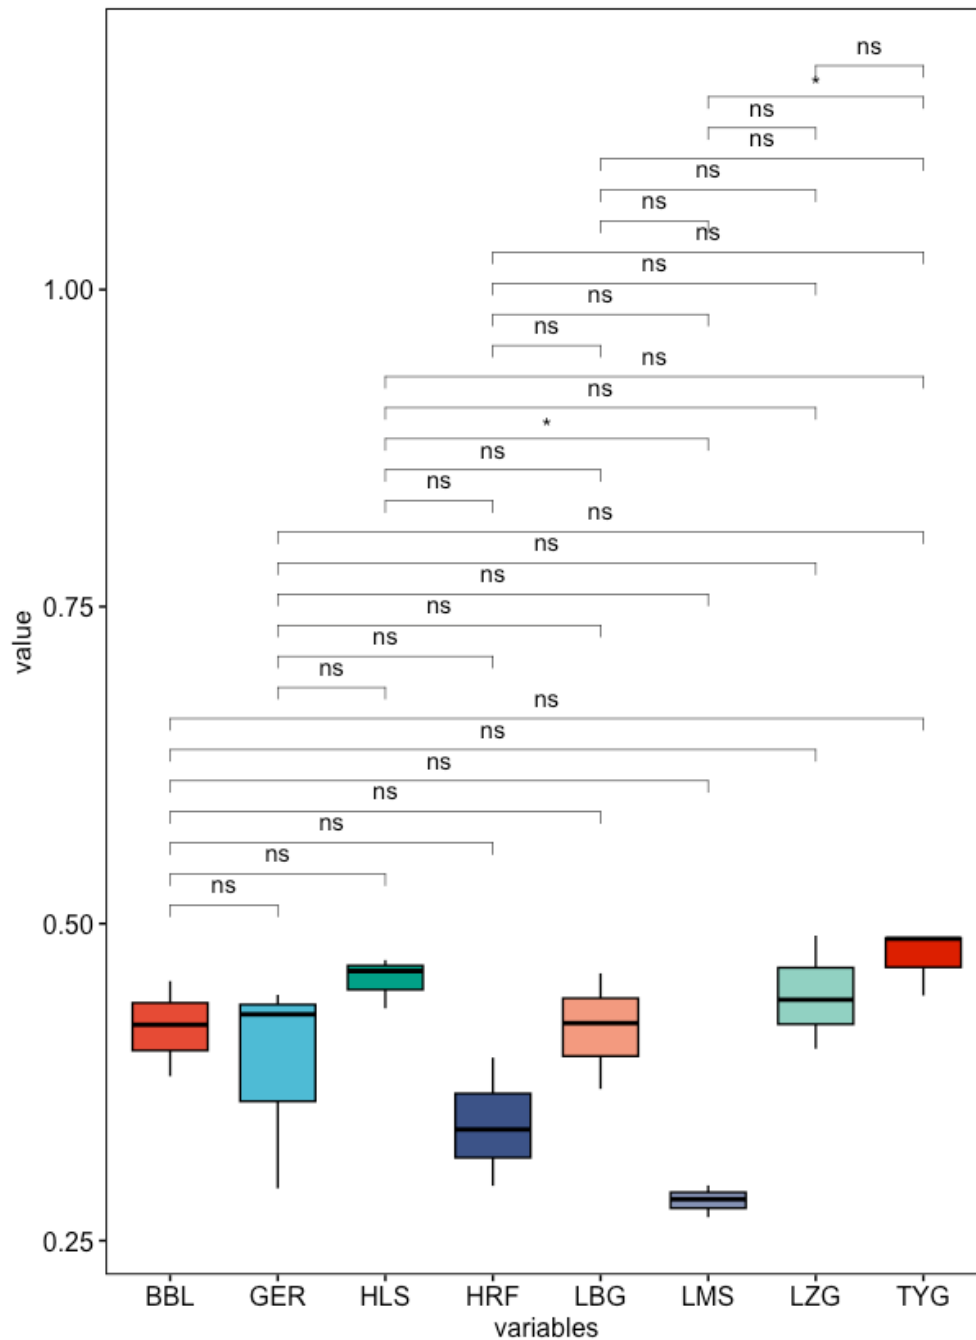

**Supplementary Figure S6.** Genome heterozygosity for all breeds. To determine the significant differences between breed pairwise T-test with Bonferroni p-value adjustment was performed. Significance levels: 'ns' - non-significant, '\*' -  $p = [0.01, 0.05]$ . Abbreviations: BBL - Belgian Blue; GER - German angus; HLS - Holstein; HRF - Hereford; LBG - Latvian Brown; LMS - Limousin; LZG - Latvian Blue; TYG - Tyrolean grey.
