# Supplementary material for: Genomic Characterization and Initial Insight into Mastitis-Associated SNP Profiles of Local Latvian Bos taurus Breeds
Source: MDPI journal article supplement (doi:10.3390/ani13172776), 2023-08-31
Supplement: s1 [file s1]

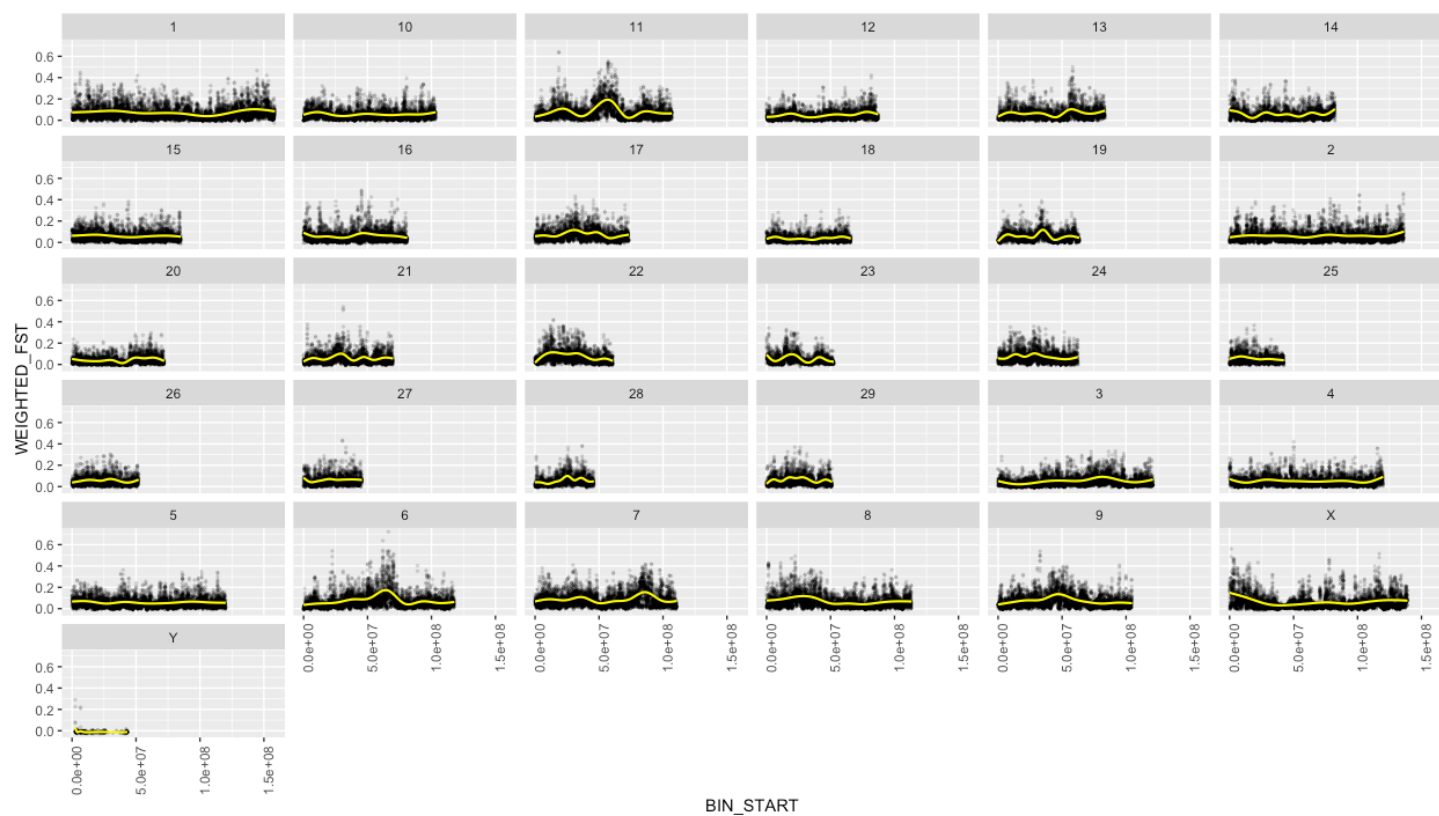

**Supplementary Figure S9.** Genome-wide distribution of weighted  $F_{ST}$  between individuals of LZG and LBG breeds. High  $F_{ST}$  value indicates a considerable degree of differentiation among the breeds.
