# Supplementary material for: Genomic Characterization and Initial Insight into Mastitis-Associated SNP Profiles of Local Latvian Bos taurus Breeds
Source: MDPI journal article supplement (doi:10.3390/ani13172776), 2023-08-31
Supplement: s1 [file s1]

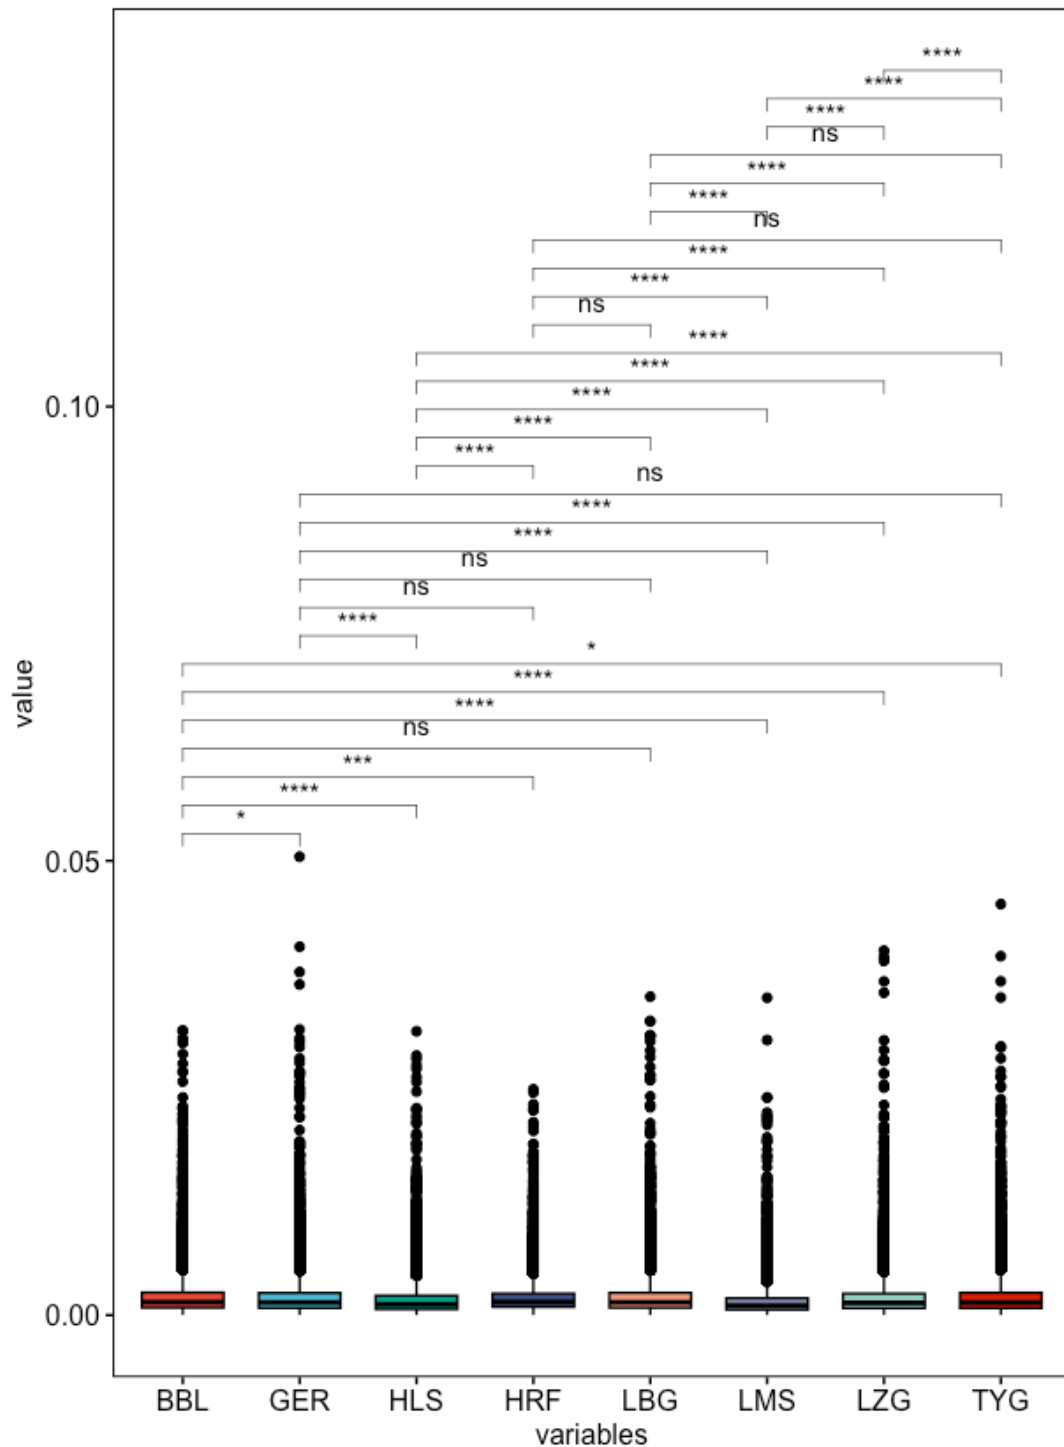

**Supplementary Figure S5.** Genome wide nucleotide diversity ( $\pi$ ) for all breeds. LBG and LZG sample sets were randomly reduced to contain 3 samples per breed. To determine the significant differences between breed pairwise T-test with Bonferroni p-value adjustment was performed. Significance levels: 'ns' – non-significant, '\*' –  $p = [0.01, 0.05]$ , '\*\*' –  $p = [0.001, 0.01]$ , '\*\*\*' –  $p = [0, 0.001]$ , '\*\*\*\*' –  $p < 0$ . Abbreviations: BBL – Belgian Blue; GER – German angus; HLS – Holstein; HRF – Hereford; LBG – Latvian Brown; LMS – Limousin; LZG – Latvian Blue; TYG – Tyrolean grey.
