# Supplementary material for: Genomic Characterization and Initial Insight into Mastitis-Associated SNP Profiles of Local Latvian Bos taurus Breeds
Source: Animals (Basel). 2023 Aug 31;13(17):2776. doi: 10.3390/ani13172776 (PMC10487150; doi:10.3390/ani13172776)
Supplement: Supplementary file 1 [file animals-13-02776-s001.zip › Table S1.xlsx]

## Sheet: Sheet1
No	Sample ID	Breed	Sequencing target	Disease status	ENA study accession	ENA/NCBI run accession	DNA extraction source and methodology	Raw sequence count	Potential coverage	Bloodiness, %									SCC in the 1st lactation
										LB (Latvian brown)	DS (Danish red)	AN (Angler/German red)	LZ (Latvian blue)	HM (Holstein Black and White)	LP (Lithuanian Light Grey)	XX (Unknown)	HS (Holstein Red)	TP (Tyrol Grey)
1	LBB-Brinums	LBG	Deep	Healthy	PRJEB60345	ERR11181849	Semen, custom protocol + KingFisher Duo	437604317	45.74261153	71.25	20.94	7.81	0	0	0	0	0	0	-
2	LBB-Namejs	LBG	Deep	Healthy	PRJEB60345	ERR11181850	Semen, custom protocol + KingFisher Duo	468384464	48.9600485	58.57	35.18	6.25	0	0	0	0	0	0	-
3	LBB-RU	LBG	Deep	Healthy	PRJEB60345	ERR11181851	Semen, custom protocol + KingFisher Duo	433858341	45.3510461	87.5	12.5	0	0	0	0	0	0	0	-
4	LBB-Vilsons	LBG	Deep	Healthy	PRJEB60345	ERR11181852	Semen, custom protocol + KingFisher Duo	451135871	47.15705969	71.30	28.70	0	0	0	0	0	0	0	-
5	LBG-Amula	LBG	Deep	Healthy	PRJEB60345	ERR11181853	Blood buffy coat; Ph/Chl method	443797741	46.39000777	72.86	27.14	0	0	0	0	0	0	0
6	LBG-Bruka	LBG	Deep	Healthy	PRJEB60345	ERR11181854	Blood buffy coat; Ph/Chl method	420703847	43.97601188	69.83	20.80	9.37	0	0	0	0	0	0
7	LBG-Duda	LBG	Deep	Healthy	PRJEB60345	ERR11181855	Blood buffy coat; Ph/Chl method	485317767	50.73008017	73.34	26.66	0	0	0	0	0	0	0
8	LBG-Guste	LBG	Deep	Healthy	PRJEB60345	ERR11181856	Blood buffy coat; Ph/Chl method	467084616	48.82417589	68.47	31.53	0	0	0	0	0	0	0
9	LZB-AL	LZG	Deep	Healthy	PRJEB60345	ERR11181889	Semen, custom protocol + KingFisher Duo	439977045	45.99063188	0	0	0	75	12.5	12.5	0	0	0	-
10	LZB-Karlos	LZG	Deep	Healthy	PRJEB60345	ERR11181890	Semen, custom protocol + KingFisher Duo	394550618	41.24222488	6.25	0	0	64.06	20.32	9.37	0	0	0	-
11	LZB-Pipars	LZG	Deep	Healthy	PRJEB60345	ERR11181891	Semen, custom protocol + KingFisher Duo	433203666	45.28261317	0	0	0	72.66	21.09	6.25	0	0	0	-
12	LZB-Samts	LZG	Deep	Healthy	PRJEB60345	ERR11181892	Semen, custom protocol + KingFisher Duo	394844156	41.27290829	32.13	0	0	52.25	15.62	0	0	0	0	-
13	LZG-Darlinga	LZG	Deep	Healthy	PRJEB60345	ERR11181893	Blood buffy coat; Ph/Chl method	476190706	49.77603199	0	0	0	75.00	25.00	0	0	0	0
14	LZG-Dzesika	LZG	Deep	Healthy	PRJEB60345	ERR11181894	Blood buffy coat; Ph/Chl method	470962511	49.22953077	23.88	0	0	62.85	13.27	0	0	0	0
15	LZG-Kripatina	LZG	Deep	Healthy	PRJEB60345	ERR11181895	Blood buffy coat; Ph/Chl method	439938622	45.98661554	24.86	9.52	0	65.62	0	0	0	0	0
16	LZG-Saulite	LZG	Deep	Healthy	PRJEB60345	ERR11181896	Blood buffy coat; Ph/Chl method	395533635	41.34497927	21.88	0	0	44.53	24.22	0	9.37	0	0
17	SLBG_Alma	LBG	Shallow	Mastitis	PRJEB60345	ERR11181857	Blood buffy coat; Ph/Chl method	111741057	11.68024986	70.91	22.06	7.03	0	0	0	0	0	0	263
18	SLBG_Amelija	LBG	Shallow	Mastitis	PRJEB60345	ERR11181858	Blood buffy coat; Ph/Chl method	128805197	13.46395787	61.92	24.02	14.06	0	0	0	0	0	0	259
19	SLBG_Amura	LBG	Shallow	Mastitis	PRJEB60345	ERR11181859	Blood buffy coat; Ph/Chl method	118440751	12.38056631	68.67	23.52	7.81	0	0	0	0	0	0	74
20	SLBG_Aumala	LBG	Shallow	Unknown	PRJEB60345	ERR11181860	Blood buffy coat; Ph/Chl method	88293564	9.229292404	64.07	21.87	14.06	0	0	0	0	0	0	303
21	SLBG_Bante	LBG	Shallow	Mastitis	PRJEB60345	ERR11181861	Blood buffy coat; Ph/Chl method	124929988	13.05888376	73.51	26.49	0	0	0	0	0	0	0	33
22	SLBG_Dama	LBG	Shallow	Mastitis	PRJEB60345	ERR11181862	Blood buffy coat; Ph/Chl method	112109974	11.71881261	73.34	26.66	0	0	0	0	0	0	0	104
23	SLBG_Duda	LBG	Shallow	Unknown	PRJEB60345	ERR11181863	Blood buffy coat; Ph/Chl method	118287395	12.36453606	73.34	26.66	0	0	0	0	0	0	0	97
24	SLBG_Durbe2	LBG	Shallow	Unknown	PRJEB60345	ERR11181864	Blood buffy coat; Ph/Chl method	114237921	11.9412461	67.73	26.02	6.25	0	0	0	0	0	0	89
25	SLBG_Dzude	LBG	Shallow	Healthy	PRJEB60345	ERR11181865	Blood buffy coat; Ph/Chl method	113010210	11.81291394	73.43	26.57	0	0	0	0	0	0	0	68
26	SLBG_Landa	LBG	Shallow	Unknown	PRJEB60345	ERR11181866	Blood buffy coat; Ph/Chl method	62353329	6.517769582	69.12	30.88	0	0	0	0	0	0	0	82
27	SLBG_Loze	LBG	Shallow	Unknown	PRJEB60345	ERR11181867	Blood buffy coat; Ph/Chl method	110906612	11.59302564	68.23	22.90	8.78	0	0	0	0	0	0	43
28	SLBG_Nata	LBG	Shallow	Unknown	PRJEB60345	ERR11181868	Blood buffy coat; Ph/Chl method	133464301	13.95097223	72.91	27.09	0	0	0	0	0	0	0	20
29	SLBG_Nida	LBG	Shallow	Mastitis	PRJEB60345	ERR11181869	Blood buffy coat; Ph/Chl method	94549663	9.883240035	65.41	34.59	0	0	0	0	0	0	0	26
30	SLBG_Nika	LBG	Shallow	Healthy	PRJEB60345	ERR11181870	Blood buffy coat; Ph/Chl method	103664767	10.83603836	75.55	24.45	0	0	0	0	0	0	0	40
31	SLBG_Rasma	LBG	Shallow	Healthy	PRJEB60345	ERR11181871	Blood buffy coat; Ph/Chl method	126709722	13.24491868	68.38	31.62	0	0	0	0	0	0	0	35
32	SLBG_Rava	LBG	Shallow	Healthy	PRJEB60345	ERR11181872	Blood buffy coat; Ph/Chl method	51046361	5.335856551	71.91	28.09	0	0	0	0	0	0	0	94
33	SLBG_Riga	LBG	Shallow	Healthy	PRJEB60345	ERR11181873	Blood buffy coat; Ph/Chl method	158358455	16.55314861	69.94	23.81	6.25	0	0	0	0	0	0	16
34	SLBG_Rime	LBG	Shallow	Mastitis	PRJEB60345	ERR11181874	Blood buffy coat; Ph/Chl method	114481765	11.96673502	77.77	22.23	0	0	0	0	0	0	0	20
35	SLBG_Ritma	LBG	Shallow	Mastitis	PRJEB60345	ERR11181875	Blood buffy coat; Ph/Chl method	123751867	12.93573523	56.66	33.97	9.37	0	0	0	0	0	0	113
36	SLBG_Roma	LBG	Shallow	Unknown	PRJEB60345	ERR11181876	Blood buffy coat; Ph/Chl method	110078072	11.50641868	61.75	38.25	0	0	0	0	0	0	0	49
37	SLBG_Ronija	LBG	Shallow	Mastitis	PRJEB60345	ERR11181877	Blood buffy coat; Ph/Chl method	109351379	11.43045774	61.93	31.82	6.25	0	0	0	0	0	0	222
38	SLBG_Rumba	LBG	Shallow	Healthy	PRJEB60345	ERR11181878	Blood buffy coat; Ph/Chl method	94933424	9.923354425	81.85	18.15	0	0	0	0	0	0	0	31
39	SLBG_Skaidra	LBG	Shallow	Mastitis	PRJEB60345	ERR11181879	Blood buffy coat; Ph/Chl method	97372261	10.17828512	60.36	27.14	12.50	0	0	0	0	0	0	251
40	SLBG_Skalbe	LBG	Shallow	Healthy	PRJEB60345	ERR11181880	Blood buffy coat; Ph/Chl method	116054105	12.13109111	73.05	20.70	6.25	0	0	0	0	0	0	234
41	SLBG_Sula	LBG	Shallow	Mastitis	PRJEB60345	ERR11181881	Blood buffy coat; Ph/Chl method	110510072	11.55157547	60.36	27.14	12.50	0	0	0	0	0	0	301
42	SLBG_Svire	LBG	Shallow	Mastitis	PRJEB60345	ERR11181882	Blood buffy coat; Ph/Chl method	113385206	11.85211213	73.93	19.82	6.25	0	0	0	0	0	0	575
43	SLBG_Vetra	LBG	Shallow	Mastitis	PRJEB60345	ERR11181883	Blood buffy coat; Ph/Chl method	94354563	9.862846307	50.79	49.21	0	0	0	0	0	0	0	188
44	SLBG_Zaiga	LBG	Shallow	Unknown	PRJEB60345	ERR11181884	Blood buffy coat; Ph/Chl method	115418926	12.0646961	62.12	21.09	16.79	0	0	0	0	0	0	88
45	SLBG_Zane	LBG	Shallow	Mastitis	PRJEB60345	ERR11181885	Blood buffy coat; Ph/Chl method	111482451	11.65321787	76.67	23.33	0	0	0	0	0	0	0	29
46	SLBG_Zube	LBG	Shallow	Mastitis	PRJEB60345	ERR11181886	Blood buffy coat; Ph/Chl method	107413777	11.22792094	82.04	17.96	0	0	0	0	0	0	0	NA
47	SLBG_Zunde	LBG	Shallow	Healthy	PRJEB60345	ERR11181887	Blood buffy coat; Ph/Chl method	106856984	11.16971958	79.99	20.01	0	0	0	0	0	0	0	60
48	SLBG_Zviedre	LBG	Shallow	Mastitis	PRJEB60345	ERR11181888	Blood buffy coat; Ph/Chl method	102901063	10.75620868	72.08	21.67	6.25	0	0	0	0	0	0	81
49	SLZG_2723	LZG	Shallow	Unknown	PRJEB60345	ERR11181897	Blood buffy coat; Ph/Chl method	118902318	12.42881373	0	0	0	52.34	47.66	0	0	0	0	NA
50	SLZG_2744	LZG	Shallow	Unknown	PRJEB60345	ERR11181898	Blood buffy coat; Ph/Chl method	116613281	12.18954157	24.36	0	0	44.49	18.65	0	0	0	12.5	NA
51	SLZG_Blazma	LZG	Shallow	Unknown	PRJEB60345	ERR11181899	Blood buffy coat; Ph/Chl method	114714035	11.99101411	16.06	0	0	55.43	16.01	0	0	0	0	NA
52	SLZG_Ciecere	LZG	Shallow	Unknown	PRJEB60345	ERR11181900	Blood buffy coat; Ph/Chl method	116728409	12.20157585	6.25	0	0	65.63	14.06	7.81	6.25	0	0	88
53	SLZG_Cielava	LZG	Shallow	Unknown	PRJEB60345	ERR11181901	Blood buffy coat; Ph/Chl method	99875691	10.4399677	22.31	0	0	62.85	14.84	0	0	0	0	169
54	SLZG_Dadze	LZG	Shallow	Mastitis	PRJEB60345	ERR11181902	Blood buffy coat; Ph/Chl method	100822062	10.5388915	0	0	0	63.48	23.24	13.28	0	0	0	234
55	SLZG_Dalija	LZG	Shallow	Mastitis	PRJEB60345	ERR11181903	Blood buffy coat; Ph/Chl method	108285081	11.31899801	10.15	0	12.11	44.14	13.28	20.32	0	0	0	107
56	SLZG_Durbe	LZG	Shallow	Unknown	PRJEB60345	ERR11181904	Blood buffy coat; Ph/Chl method	102354140	10.69903902	10.15	0	12.11	44.14	13.28	20.32	0	0	0	283
57	SLZG_Dzelda	LZG	Shallow	Mastitis	PRJEB60345	ERR11181905	Blood buffy coat; Ph/Chl method	124380987	13.0014969	7.03	0	12.11	27.74	21.87	31.25	0	0	0	280
58	SLZG_Dzerve	LZG	Shallow	Mastitis	PRJEB60345	ERR11181906	Blood buffy coat; Ph/Chl method	113750585	11.89030505	7.03	0	12.11	27.74	21.87	31.25	0	0	0	53
59	SLZG_Hinta	LZG	Shallow	Mastitis	PRJEB60345	ERR11181907	Blood buffy coat; Ph/Chl method	111341166	11.63844941	0	0	0	42.19	14.85	0	6.25	11.71	25.00	34
60	SLZG_Kaprija	LZG	Shallow	Healthy	PRJEB60345	ERR11181908	Blood buffy coat; Ph/Chl method	99774346	10.42937415	16.07	0	0	47.22	24.21	0	0	0	12.50	48
61	SLZG_Lacene	LZG	Shallow	Unknown	PRJEB60345	ERR11181909	Blood buffy coat; Ph/Chl method	106279563	11.10936199	16.07	0	0	54.25	29.68	0	0	0	0	NA
62	SLZG_Liana	LZG	Shallow	Unknown	PRJEB60345	ERR11181910	Blood buffy coat; Ph/Chl method	112551902	11.76500718	25.21	0	0	41.6	14.06	10.15	0	0	0	80
63	SLZG_Liga	LZG	Shallow	Mastitis	PRJEB60345	ERR11181911	Blood buffy coat; Ph/Chl method	104781721	10.95279314	19.97	0	8.98	43.32	20.31	0	6.25	0	0	505
64	SLZG_Lina	LZG	Shallow	Unknown	PRJEB60345	ERR11181912	Blood buffy coat; Ph/Chl method	104787437	10.95339063	19.97	0	0	49.96	30.07	0	0	0	0	NA
65	SLZG_Mezroze	LZG	Shallow	Unknown	PRJEB60345	ERR11181913	Blood buffy coat; Ph/Chl method	117241008	12.25515763	25.43	0	0	43.72	18.35	0	0	0	12.5	NA
66	SLZG_Olina	LZG	Shallow	Unknown	PRJEB60345	ERR11181914	Blood buffy coat; Ph/Chl method	172357510	18.01646446	16.06	0	0	46.07	29.09	0	0	8.78	0	147
67	SLZG_Palsa	LZG	Shallow	Unknown	PRJEB60345	ERR11181915	Blood buffy coat; Ph/Chl method	106497392	11.13213157	7.81	12.50	0	34.38	25.00	0	12.50	0	0	60
68	SLZG_Perse	LZG	Shallow	Mastitis	PRJEB60345	ERR11181916	Blood buffy coat; Ph/Chl method	106336498	11.11531338	0	0	6.25	34.38	10.93	23.44	0	0	25.00	76
69	SLZG_Rozite	LZG	Shallow	Mastitis	PRJEB60345	ERR11181917	Blood buffy coat; Ph/Chl method	119400475	12.48088589	0	0	7.81	73.84	26.16	0	0	0	0	69
70	SLZG_Salna	LZG	Shallow	Unknown	PRJEB60345	ERR11181918	Blood buffy coat; Ph/Chl method	104283123	10.90067488	0	0	0	18.75	28.12	53.13	0	0	0	246
71	SLZG_Salna2	LZG	Shallow	Unknown	PRJEB60345	ERR11181919	Blood buffy coat; Ph/Chl method	116209834	12.14736941	18.75	0	0	44.14	37.11	0	0	0	0	NA
72	SLZG_Sidra	LZG	Shallow	Mastitis	PRJEB60345	ERR11181920	Blood buffy coat; Ph/Chl method	104062605	10.87762422	0	0	0	40.26	29.87	21.09	0	8.78	0	189
73	SLZG_Sparite	LZG	Shallow	Unknown	PRJEB60345	ERR11181921	Blood buffy coat; Ph/Chl method	102807395	10.7464176	0	0	0	45.33	33.59	0	9.37	11.71	0	54
74	SLZG_Teika	LZG	Shallow	Unknown	PRJEB60345	ERR11181922	Blood buffy coat; Ph/Chl method	116104432	12.13635178	0	0	0	34.38	24.22	0	0	0	29.68	52
75	SLZG_Turaida	LZG	Shallow	Healthy	PRJEB60345	ERR11181923	Blood buffy coat; Ph/Chl method	119562474	12.49781958	16.07	12.50	0	54.25	10.93	0	6.25	0	0	123
76	SLZG_Upe	LZG	Shallow	Mastitis	PRJEB60345	ERR11181924	Blood buffy coat; Ph/Chl method	115782612	12.10271206	12.89	0	0	40.24	10.93	23.44	0	0	12.50	14
77	SLZG_Venta	LZG	Shallow	Unknown	PRJEB60345	ERR11181925	Blood buffy coat; Ph/Chl method	115887278	12.11365275	12.50	0	0	46.88	15.62	0	0	0	25.00	114
78	SLZG_Vine	LZG	Shallow	Unknown	PRJEB60345	ERR11181926	Blood buffy coat; Ph/Chl method	128910926	13.47500969	0	14.06	0	37.51	21.09	21.09	0	0	6.25	157
79	SLZG_Zemene	LZG	Shallow	Mastitis	PRJEB60345	ERR11181927	Blood buffy coat; Ph/Chl method	107699981	11.25783774	7.03	0	8.98	42.59	31.25	10.15	0	11.72	0	80
80	SLZG_Zilupe	LZG	Shallow	Unknown	PRJEB60345	ERR11181928	Blood buffy coat; Ph/Chl method	88104565	9.209536411	0	0	0	35.16	14.84	50.00	0	0	0	177
81	HLS_1	HLS	-	-	PRJNA210521	SRR934405	-	170511249	17.82347551	NA	NA	NA	NA	NA	NA	NA	NA	NA	NA
82	HLS_3	HLS	-	-	PRJNA210521	SRR934414	-	230316320	24.07487666	NA	NA	NA	NA	NA	NA	NA	NA	NA	NA
83	HLS_2	HLS	-	-	PRJNA210521	SRR934413	-	238847676	24.96665603	NA	NA	NA	NA	NA	NA	NA	NA	NA	NA
84	HRF_1	HRF	-	-	PRJNA762180	SRR15840409	-	158104334	16.526585436	NA	NA	NA	NA	NA	NA	NA	NA	NA	NA
85	HRF_2	HRF	-	-	PRJNA762180	SRR15840411	-	160272901	16.753264913	NA	NA	NA	NA	NA	NA	NA	NA	NA	NA
86	HRF_3	HRF	-	-	PRJNA762180	SRR15840412	-	160487570	16.775704182	NA	NA	NA	NA	NA	NA	NA	NA	NA	NA
87	LMS_1	LMS	-	-	PRJNA526664	SRR8727721	-	74886118	7.827817213	NA	NA	NA	NA	NA	NA	NA	NA	NA	NA
88	LMS_2	LMS	-	-	PRJNA526664	SRR8727724	-	85110053	8.8965212195	NA	NA	NA	NA	NA	NA	NA	NA	NA	NA
89	LMS_3	LMS	-	-	PRJNA526664	SRR8727725	-	71978403	7.5238748781	NA	NA	NA	NA	NA	NA	NA	NA	NA	NA
90	BBL_3	BBL	-	-	PRJNA474946	SRR7363725	-	191843482	20.053325645	NA	NA	NA	NA	NA	NA	NA	NA	NA	NA
91	BBL_1	BBL	-	-	PRJNA474946	SRR7363701	-	102826691	10.748434599	NA	NA	NA	NA	NA	NA	NA	NA	NA	NA
92	BBL_2	BBL	-	-	PRJNA474946	SRR7363723	-	127915309	13.370938223	NA	NA	NA	NA	NA	NA	NA	NA	NA	NA
93	TYG_2	TYG	-	-	PRJEB18113	ERR4291969	-	163642780	17.105517073	NA	NA	NA	NA	NA	NA	NA	NA	NA	NA
94	TYG_1	TYG	-	-	PRJEB18113	ERR4291967	-	271186536	28.3470246689	NA	NA	NA	NA	NA	NA	NA	NA	NA	NA
95	TYG_3	TYG	-	-	PRJEB5435	ERR430968	-	178055618	18.6120855052	NA	NA	NA	NA	NA	NA	NA	NA	NA	NA
96	GER_3	GER	-	-	PRJNA438601	SRR6895116	-	78532949	8.2090190592	NA	NA	NA	NA	NA	NA	NA	NA	NA	NA
97	GER_1	GER	-	-	PRJNA855305	SRR20012772	-	131054426	13.6990689199	NA	NA	NA	NA	NA	NA	NA	NA	NA	NA
98	GER_2	GER	-	-	PRJNA855305	SRR20012773	-	138789889	14.507653902	NA	NA	NA	NA	NA	NA	NA	NA	NA	NA

## Sheet: Sheet2
Number of LBG and LZG cows` blood and milk samples for different herds
LBG cows									LZG cows
Herd No	Blood samples	SCC**			Milk samples				Herd No	Blood samples	SCC**			Milk samples
		Total	<200k	>200k	Total	Positive*	Negative				Total	<200k	>200k	Total	Positive*	Negative
1	18	17	16	1	13	7	6		8	9	9	8	1	2	0	2
2	7	7	7	0	5	3	2		9	8	8	7	1	5	2	3
3	4	4	0	4	4	3	1		10	7	7	4	3	6	0	6
4	4	4	1	3	3	3	0		11	4	x	x	x	x	x	x
5	1	1	1	0	1	0	1		12	5	x	x	x	1	1	0
6	2	2	2	0	2	0	2		13	1	1	1	0	1	1	0
Total:	36	35	27	8	28	16	12#		14	1	1	1	0	1	1	0
									15	1	1	1	0	1	1	0
									Total:	36	27	22	5	17	6#	11
LZG - Latvian Blue cow breed
LBG - Latvian Brown cow breed
Microbiological testing was performed only for cows from whom milk samples were available at the time of the sample collection for the study.
# - four sequenced bulls from each breed are not included in this table
* Positive/Negative - presence of microorganisms detected /not detected in milk samples by culture based test
* SCC count during the first lactation. Data on SCC were obtained from routine examination records
200k - 200.000 cells per 1ml of milk
x - no data available
