# Supplementary figures and images for: Genomic Characterization and Initial Insight into Mastitis-Associated SNP Profiles of Local Latvian Bos taurus Breeds
Source: MDPI journal article supplement (doi:10.3390/ani13172776), 2023-08-31

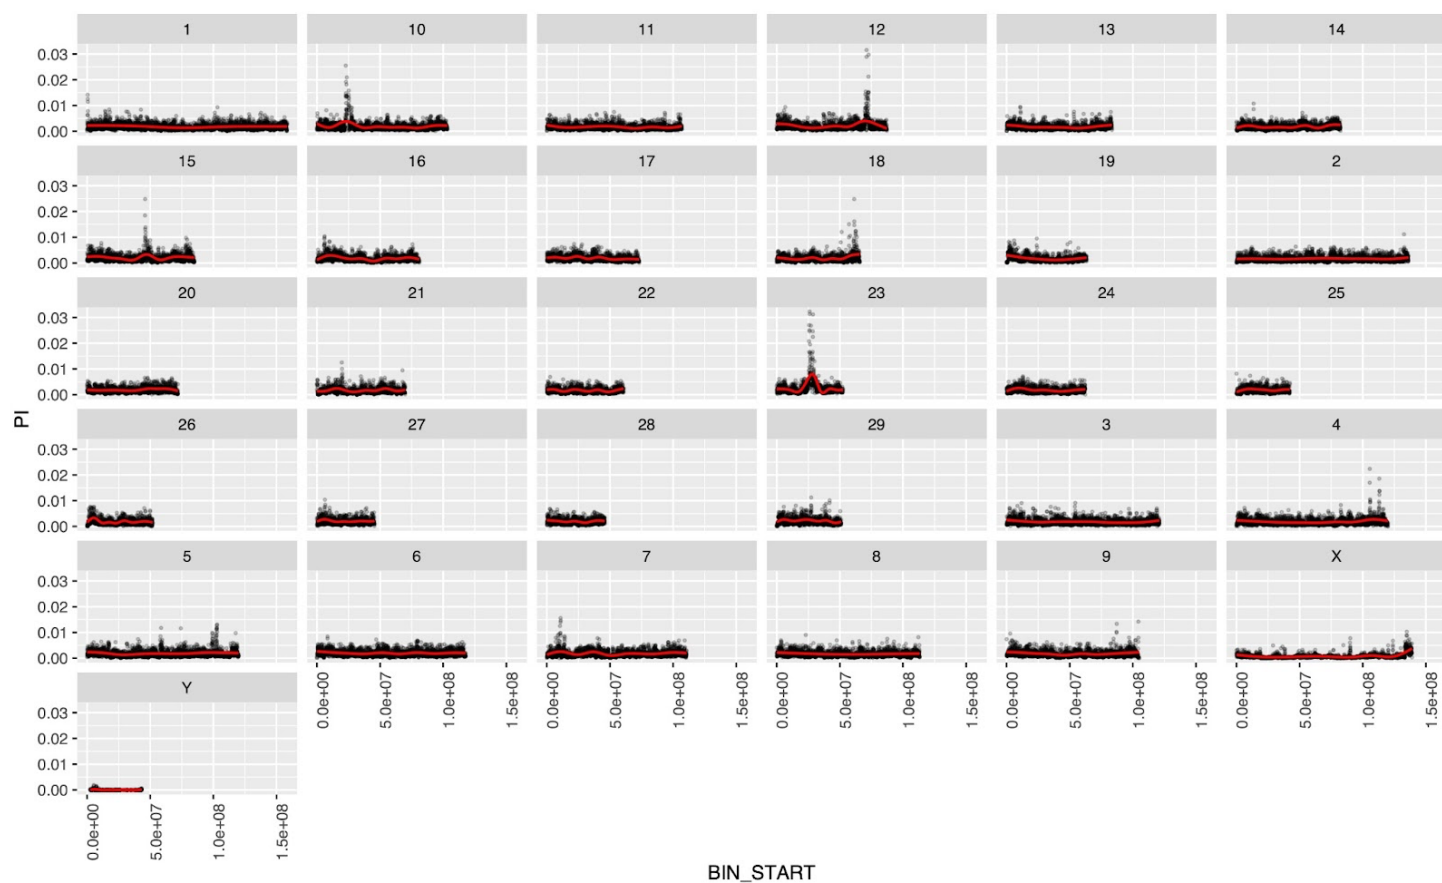

**Supplementary Figure S3.** Nucleotide divergence ( $\pi$ ) across all chromosomes of LBG breed (n=40).

Supplement: s1 [file s1]

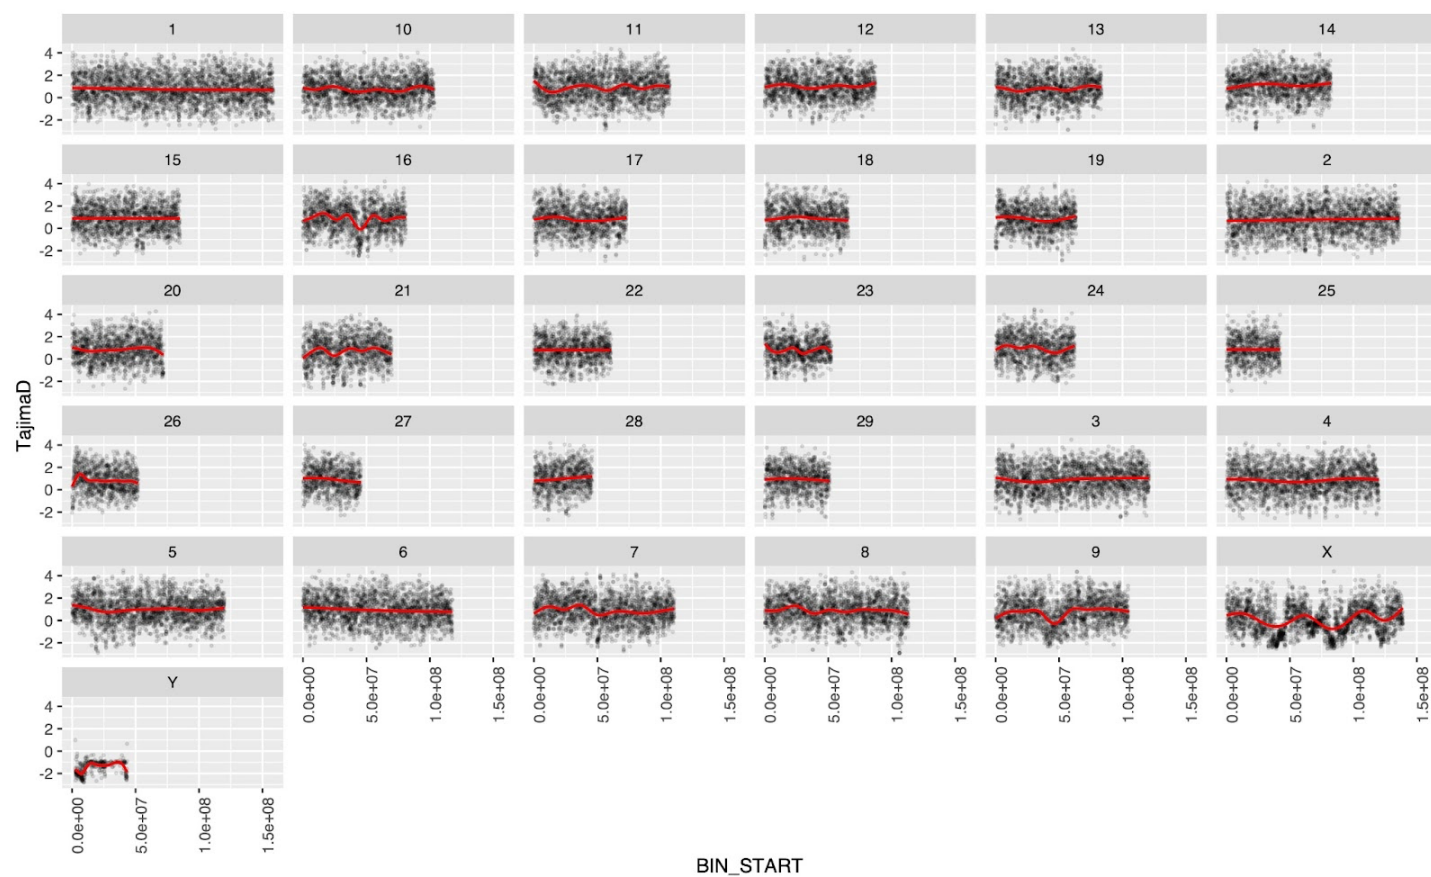

**Supplementary Figure S7.** Tajima's D across all chromosomes of LBG breed (n=40).

Supplement: s1 [file s1]

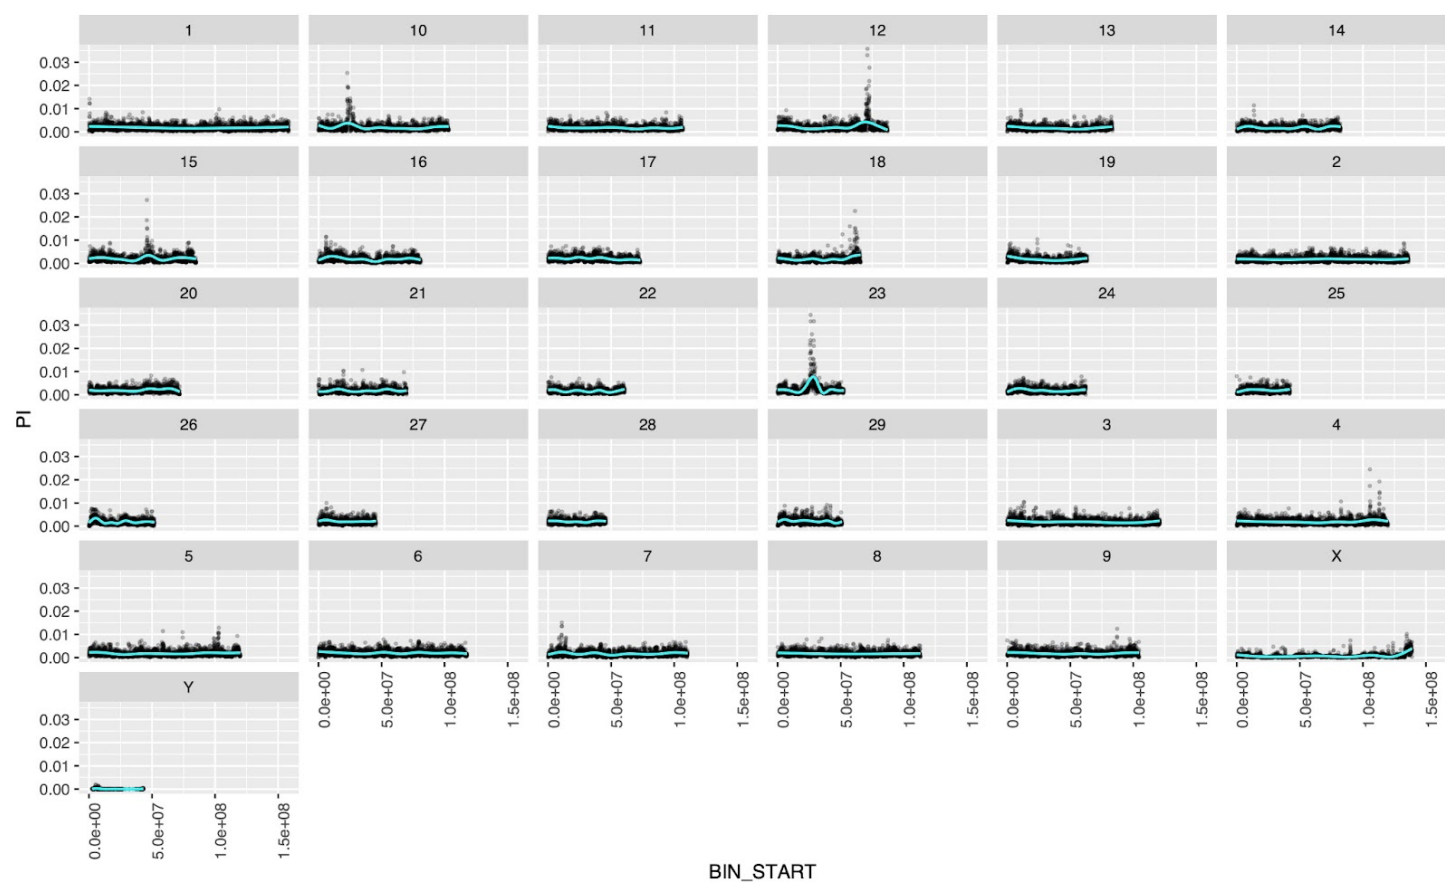

**Supplementary Figure S4.** Nucleotide divergence ( $\pi$ ) across all chromosomes of LZG breed (n=40).

Supplement: s1 [file s1]

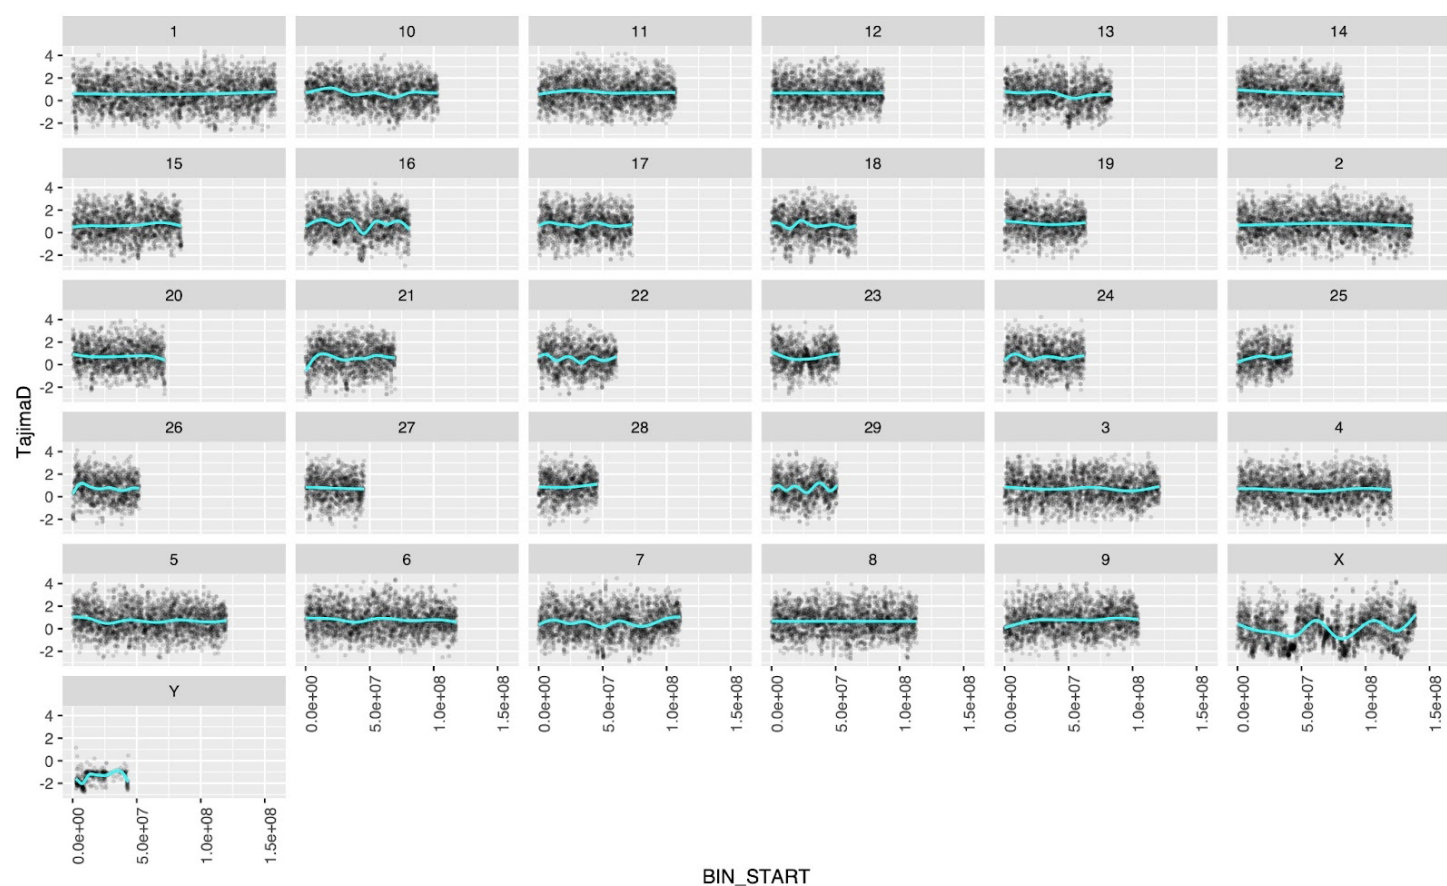

**Supplementary Figure S8.** Tajima's D across all chromosomes of LZG breed (n=40).

Supplement: s1 [file s1]
